# Supplementary material for: Regulating Ag–Cu synergy effect via Cu doping numbers to boost CO2 electroreduction on Ag14 nanoclusters
Source: Royal Society of Chemistry journal article supplement (doi:10.1039/d5cc02587g), 2025-01-01
Supplement: d5cc02587g1.pdf [file d5cc02587g1.pdf]

## Supporting Information

### Regulating Ag-Cu Synergy Effect via Cu Doping Numbers to Boost CO<sub>2</sub> Electroreduction on Ag<sub>14</sub> Nanoclusters

Along Ma,<sup>‡a</sup> Yonggang Ren,<sup>‡b</sup> Yang Zuo,<sup>b</sup> Jiaqi Zhao,<sup>a</sup> Shuo Zhang,<sup>\*a</sup> Xiaoshuang Ma<sup>\*b</sup> and Shuxin Wang<sup>\*a,b</sup>

<sup>a</sup>Key Laboratory of Optic-electric Sensing and Analytical Chemistry for Life Science, MOE, Shandong Key Laboratory of Biochemical Analysis, College of Chemistry and Molecular Engineering, Qingdao University of Science and Technology, Qingdao 266042, P. R. China.

<sup>b</sup>College of Materials Science and Engineering, Qingdao University of Science and Technology, Qingdao 266042, P. R. China.

\*Corresponding authors. E-mail: [shuxin\\_wang@qust.edu.cn](mailto:shuxin_wang@qust.edu.cn) (Shuxin Wang), [xiaoshuang\\_ma@qust.edu.cn](mailto:xiaoshuang_ma@qust.edu.cn) (Xiaoshuang Ma) and [zhangshuo@qust.edu.cn](mailto:zhangshuo@qust.edu.cn) (Shuo Zhang).

<sup>‡</sup>These authors contributed equally to this work.

Notes: The authors declare no competing financial interest.

### Table of Contents

#### Section 1. Synthesis, Characterization, Electrochemical measurements, and DFT calculations

- I. Synthesis
- II. Characterization
- III. Electrochemical measurements
- IV. DFT calculations

#### Section 2. Supporting Figures

- Fig. S1** The optical microscopic image of the single crystals of Ag<sub>14</sub>, (AgCu)<sub>14</sub>-1, and (AgCu)<sub>14</sub>-2 NCs.
- Fig. S2** The thermal ellipsoids of the ORTEP diagram of the Ag<sub>14</sub> NC.
- Fig. S3** The thermal ellipsoids of the ORTEP diagram of the (AgCu)<sub>14</sub>-1 NC.
- Fig. S4** The thermal ellipsoids of the ORTEP diagram of the (AgCu)<sub>14</sub>-2 NC.
- Fig. S5** The presence of four Ag<sub>14</sub> cluster molecules in a unit cell.
- Fig. S6** The presence of four (AgCu)<sub>14</sub>-1 cluster molecules in a unit cell.
- Fig. S7** The presence of four (AgCu)<sub>14</sub>-2 cluster molecules in a unit cell.
- Fig. S8** Structural analysis of Ag<sub>8</sub>S<sub>12</sub>P<sub>4</sub> shell.
- Fig. S9** The coordination modes of Ag atoms in Ag<sub>14</sub> NC.
- Fig. S10** The occupancy information of metal sites 1-4 in (AgCu)<sub>14</sub>-1 and (AgCu)<sub>14</sub>-2 NCs.
- Fig. S11** Structural comparison and bond length among Ag<sub>14</sub>, (AgCu)<sub>14</sub>-1, and (AgCu)<sub>14</sub>-2 NCs.

- Fig. S12** UV-vis absorption spectra (photon energy scale) of the  $\text{Ag}_{14}$ ,  $(\text{AgCu})_{14-1}$ , and  $(\text{AgCu})_{14-2}$  NCs in  $\text{CH}_2\text{Cl}_2$ .
- Fig. S13** SEM image and corresponding elemental mapping images of the  $\text{Ag}_{14}$  crystals.
- Fig. S14** SEM image and corresponding elemental mapping images of the  $(\text{AgCu})_{14-1}$  crystals.
- Fig. S15** SEM image and corresponding elemental mapping images of the  $(\text{AgCu})_{14-2}$  crystals.
- Fig. S16** Cu 2p spectra of  $(\text{AgCu})_{14-1}$  and  $(\text{AgCu})_{14-2}$  NCs.
- Fig. S17** The Cu LMM Auger spectra of the  $(\text{AgCu})_{14-1}$  and  $(\text{AgCu})_{14-2}$  NCs.
- Fig. S18** Gas products ( $\text{CO}$ ,  $\text{CH}_4$  and  $\text{C}_2\text{H}_4$ ) analysis for  $\text{eCO}_2\text{RR}$  on  $\text{Ag}_{14}/\text{GDE}$ ,  $(\text{AgCu})_{14-1}/\text{GDE}$ , and  $(\text{AgCu})_{14-2}/\text{GDE}$ .
- Fig. S19**  $^1\text{H}$  NMR spectral data of liquid products for the  $\text{Ag}_{14}/\text{GDE}$ ,  $(\text{AgCu})_{14-1}/\text{GDE}$ , and  $(\text{AgCu})_{14-2}/\text{GDE}$  catalysts.
- Fig. S20** Electrochemical impedance spectra of the  $\text{Ag}_{14}/\text{GDE}$ ,  $(\text{AgCu})_{14-1}/\text{GDE}$ , and  $(\text{AgCu})_{14-2}/\text{GDE}$  catalysts.
- Fig. S21** Cyclic voltammetry and current density of  $\text{Ag}_{14}/\text{GDE}$ ,  $(\text{AgCu})_{14-1}/\text{GDE}$ , and  $(\text{AgCu})_{14-2}/\text{GDE}$  catalysts at a scan rate from 20, 40, 60, 80, and 100  $\text{mV}\cdot\text{s}^{-1}$ .
- Fig. S22** Tafel plots constructed for the  $\text{eCO}_2\text{RR}$  on the three catalysts.
- Fig. S23** FEs for various  $\text{eCO}_2\text{RR}$  products obtained on  $\text{Ag}_{14}/\text{GDE}$  catalyst in a 1 M KOH solution.
- Fig. S24**  $\text{H}_2$  and  $\text{CH}_4$  partial current density of the  $\text{Ag}_{14}/\text{GDE}$ ,  $(\text{AgCu})_{14-1}/\text{GDE}$ , and  $(\text{AgCu})_{14-2}/\text{GDE}$  catalysts at different potentials.
- Fig. S25**  $\text{CO}$  and  $\text{HCOOH}$  faradaic efficiency and partial current density of the  $\text{Ag}_{14}/\text{GDE}$ ,  $(\text{AgCu})_{14-1}/\text{GDE}$ , and  $(\text{AgCu})_{14-2}/\text{GDE}$  catalysts at different potentials.
- Fig. S26**  $\text{CH}_3\text{COOH}$ ,  $\text{C}_2\text{H}_4$ , and  $\text{C}_2\text{H}_5\text{OH}$  faradaic efficiency and partial current density of the  $\text{Ag}_{14}/\text{GDE}$ ,  $(\text{AgCu})_{14-1}/\text{GDE}$ , and  $(\text{AgCu})_{14-2}/\text{GDE}$  catalysts at different potentials.
- Fig. S27** The turnover frequency of  $\text{CH}_4$  products was obtained from  $(\text{AgCu})_{14-1}/\text{GDE}$  and  $(\text{AgCu})_{14-2}/\text{GDE}$ .
- Fig. S28** Catalytic stability of  $(\text{AgCu})_{14-1}/\text{GDE}$  at  $-1.6 \text{ V}_{\text{RHE}}$  for 12 h, (top)  $i$ -t curve; (bottom) selectivity of various  $\text{eCO}_2\text{RR}$  products at different time.
- Fig. S29** UV-vis absorbance spectra of the  $\text{Ag}_{14}$ ,  $(\text{AgCu})_{14-1}$ , and  $(\text{AgCu})_{14-2}$  NCs before and after  $\text{eCO}_2\text{RR}$ .
- Fig. S30** The average Bader charge densities of the Ag atoms in  $\text{Ag}_6$  core, the Ag atoms in  $\text{AgS}_3\text{P}$  motifs, and the Cu atoms of the  $\text{Ag}_{14-x}\text{Cu}_x$  ( $x=0-4$ ) structure.
- Fig. S31** Calculated the free energy diagram for  $^*\text{CO}_2$ ,  $^*\text{COOH}$ , and  $^*\text{CO}$  intermediates on the  $\text{Ag}_{14-x}\text{Cu}_x$  ( $x = 0/1/2/3/4$ ).

### Section 3. Supporting Table

**Table S1** The crystal structure parameters for  $\text{Ag}_{14}$ .

**Table S2** The crystal structure parameters for  $(\text{AgCu})_{14-1}$ .

**Table S3** The crystal structure parameters for  $(\text{AgCu})_{14-2}$ .

## Section 1. Synthesis, Characterization, Electrochemical measurements, and DFT calculations

### I. Synthesis

**Chemicals:** All reagents were commercially available and used without further purification. Silver nitrate ( $\text{AgNO}_3$ , 98% metals basis), copper(II) nitrate trihydrate ( $\text{Cu}(\text{NO}_3)_2 \cdot 3\text{H}_2\text{O}$ , 98% metal basis), pentafluorothiophenol (PFBT, 99%), tris(*m*-methoxyphenyl)phosphine ( $\text{P}(\text{Ph-}m\text{-OMe})_3$ , 98%), sodium borohydride ( $\text{NaBH}_4$ , 98%), methyl alcohol ( $\text{CH}_3\text{OH}$ , MeOH, HPLC grade), ethyl alcohol ( $\text{CH}_3\text{CH}_2\text{OH}$ , EtOH, HPLC grade), dichloromethane ( $\text{CH}_2\text{Cl}_2$ , DCM, HPLC grade) and *n*-hexane ( $\text{C}_6\text{H}_{14}$ , Hex, HPLC grade), were used to carry out the experiments. All glassware was thoroughly cleaned with aqua regia ( $V_{\text{HCl}} : V_{\text{HNO}_3} = 3:1$ ), rinsed with copious pure water, and then dried in an oven prior to use.

**Synthesis of  $\text{Ag}_{14}(\text{SPhF}_5)_{12}(\text{P}(\text{Ph-}m\text{-OMe})_3)_4$  ( $\text{Ag}_{14}$ ) NC:** Typically,  $\text{AgNO}_3$  (37.5 mg, 0.22 mmol) was first dissolved in a solvent mixture of 10 mL  $\text{CH}_3\text{OH}$  and 10 mL  $\text{CH}_2\text{Cl}_2$ . After stirring for 5 minutes, PFBT (40  $\mu\text{L}$ , 0.30 mmol) and  $\text{P}(\text{Ph-}m\text{-OMe})_3$  (134 mg, 0.38 mmol) were sequentially added in turn, resulting in a color change from colorless to milky white to colorless. Following an additional 20 minutes of vigorous stirring,  $\text{NaBH}_4$  (30 mg, 0.79 mmol), dissolved in 2 mL  $\text{H}_2\text{O}$ , was quickly introduced, causing the solution to gradually darken. The reaction mixture was maintained at room temperature for 12 hours to complete the formation of  $\text{Ag}_{14}$  NCs. Subsequently, the organic phase was centrifuged for 5 minutes at 8000 rpm. The precipitate was discarded, and the organic solvent was evaporated to obtain the crude  $\text{Ag}_{14}$  NCs. The crude product was washed three times with 15 mL of *n*-hexane. Yellow, block-like crystals were obtained by crystallizing the purified NCs in a 1:3 mixture of  $\text{CH}_2\text{Cl}_2$  and  $\text{CH}_3\text{OH}$  over two days at approximately 4 °C. The yield is 37% based on the Ag element (calculated from the  $\text{AgNO}_3$ ) for the synthesis of  $\text{Ag}_{14}$ .

**Synthesis of  $\text{Ag}_{14-x}\text{Cu}_x(\text{SPhF}_5)_{12}(\text{P}(\text{Ph-}m\text{-OMe})_3)_4$  ( $1 \leq x \leq 4$ , ( $\text{AgCu})_{14-1}$ ) NC:** The  $\text{Ag}_{12}\text{Cu}_2$  NCs were synthesized using a methodology analogous to that employed for the  $\text{Ag}_{14}$  NCs. Specifically,  $\text{AgNO}_3$  (37.5 mg, 0.22 mmol) and  $\text{Cu}(\text{NO}_3)_2 \cdot 3\text{H}_2\text{O}$  (8.9 mg, 0.037 mmol) were added to a solvent mixture comprising 10 mL  $\text{CH}_3\text{OH}$  and 10 mL  $\text{CH}_2\text{Cl}_2$  under vigorous stirring. After stirring for 5 minutes, PFBT (40  $\mu\text{L}$ , 0.30 mmol) and  $\text{P}(\text{Ph-}m\text{-OMe})_3$  (134 mg, 0.38 mmol) were sequentially introduced, resulting in a color change from colorless to yellow to white. After 20 minutes, a solution of  $\text{NaBH}_4$  (30 mg, 0.79 mmol) dissolved in 2 mL EtOH was rapidly added, causing the solution to gradually darken. The reaction was maintained at room temperature for 12 hours to facilitate the formation of the ( $\text{AgCu})_{14-1}$  NCs. Following the reaction completion, the reaction solution was centrifuged for 5 minutes at 8000 rpm. The supernatant was discarded, and the precipitate was retained for further processing. The precipitate was washed three times with  $\text{CH}_3\text{OH}$  to obtain pure ( $\text{AgCu})_{14-1}$  NCs. Yellow, block-like crystals were obtained by crystallizing the purified NCs in a 1:3 mixture of  $\text{CH}_2\text{Cl}_2$  and  $\text{CH}_3\text{OH}$  over two days at approximately 4 °C. The yield is 33% for ( $\text{AgCu})_{14-1}$  based on the Ag element (calculated from the  $\text{AgNO}_3$ ).

**Synthesis of  $\text{Ag}_{14-x}\text{Cu}_x(\text{SPhF}_5)_{12}(\text{P}(\text{Ph-}m\text{-OMe})_3)_4$  ( $1 \leq x \leq 6$ , ( $\text{AgCu})_{14-2}$ ) NCs:** Based on the synthesis method of ( $\text{AgCu})_{14-1}$  NCs, ( $\text{AgCu})_{14-2}$  NCs were synthesized after increasing the amount of Cu salt to 21.5 mg (0.089 mmol). The yield of ( $\text{AgCu})_{14-2}$  was approximately 37%, based on the Ag element (calculated from  $\text{AgNO}_3$ ).

### II. Characterization

**Ultraviolet-visible spectroscopy (UV-vis):** The UV-vis measurements in this study were recorded on an

Agilent Cary 5000 UV-Vis-NIR spectrophotometer. All crystal samples were dissolved in CH<sub>2</sub>Cl<sub>2</sub> for spectrum measurements.

**X-ray photoelectron spectroscopy (XPS):** The XPS measurements were performed on ESCALAB XI+ configured with a monochromated Al<sub>Kα</sub> (1486.8 eV) 150W X-ray source, 0.5 mm circular spot size, a flood gun to counter charging effects, and the analysis chamber base pressure lower than 1 × 10<sup>-9</sup> mbar, data were collected with FAT = 20 eV. The crystal particles of Ag<sub>14</sub>, (AgCu)<sub>14-1</sub>, and (AgCu)<sub>14-2</sub> were adhered to packaging tape for testing, and a small amount of carbon was added to assist with data correction.

**Scanning electron microscope-energy dispersive spectrometer (SEM-EDS):** SEM-EDS was conducted on HITACHI Regulus 8100. The crystal particles of Ag<sub>14</sub>, (AgCu)<sub>14-1</sub>, and (AgCu)<sub>14-2</sub> were tested by sticking on a conductive adhesive with an accelerating voltage of 0.1-30 kV.

**Electrospray ionization mass spectrometry (ESI-MS):** ESI-MS measurements were carried out on a Bruker micro TOF-Q system in positive or negative ion mode in the range *m/z* = 1000-6000. To prepare the ESI sample, clusters were dissolved in CH<sub>2</sub>Cl<sub>2</sub>/CH<sub>3</sub>OH (V/V = 1 : 3).

#### **X-ray crystallography:**

**Data collection:** The data collections for single crystal X-ray diffraction (SC-XRD) were carried out on a Bruker D8 Quest at 170 K, using a Mo-Kα radiation ( $\lambda$  = 0.71073 Å).

**Structure solution:** The structures were solved by using the structure solution program ShelXT with the Intrinsic Phasing method in the OLEX2 software.

**Structure Refinement:** Refinements were performed on *F*<sup>2</sup> anisotropically for all the non-hydrogen atoms by the full-matrix least-squares method using the SHELXL program in Olex2 software. And all the hydrogen atoms were set in geometrically calculated positions and refined isotopically using a riding model.

**Refinement Details of Ag<sub>14</sub>:** The methoxy group (C-O) exhibited disorder resolved by splitting into two orientations (C157-O3/C155-O11) with refined occupancy ratios of 0.602 : 0.398. The disordered carbon atom (C) in the phosphine ligand was modeled as two split positions (C37/C39) with an occupancy ratio of 0.68 : 0.32. Geometrical restraints were applied to maintain chemically reasonable bond lengths. Anisotropic displacement parameters (ADPs) of overlapping atoms were constrained using SIMU and RIGU instructions to ensure physically meaningful thermal motion correlation.

**Refinement Details of (AgCu)<sub>14-1</sub>:** Methoxy group disorder (C-O) was modeled as two split orientations (C19A-O11A/C19B-O11B) with refined occupancies of 0.174 : 0.826. The disordered silver atom (Ag) in the cluster shell was split into two positions (Ag11/Ag2) with an occupancy ratio of 0.53 : 0.47. For the four Ag/Cu co-occupied sites: Three sites (Cu12/Ag15, Cu2/Ag17, and Cu13/Ag16) shared a common refinement variable, yielding a uniform Cu : Ag = 0.654 : 0.346; The fourth site (Cu14/Ag18) was independently refined to Cu : Ag = 0.846 : 0.154. Geometrical restraints were applied to maintain reasonable bond lengths, and anisotropic displacement parameters (ADPs) were constrained using SIMU and RIGU instructions to ensure physically reasonable thermal motion.

**Refinement Details of (AgCu)<sub>14-2</sub>:** Sulfur atom disorder (S10A/S10B) in the cluster shell was modeled with an occupancy ratio of 0.53 : 0.47. The four Ag/Cu co-occupied sites refined to: Ag12/Cu4 = 0.137 : 0.863, Ag14/Cu1 = 0.08 : 0.92, Ag15/Cu3 = 0.133 : 0.867, and Ag13/Cu2 = 0.113 : 0.887. The P(Ph-*m*-OMe)<sub>3</sub> ligand and bonded Ag atoms (Ag5/Ag9) exhibited two-directional disorder with an occupancy ratio of 0.638 : 0.362. Geometrical constraints ensured reasonable bond lengths, and the EADP directive was applied to Ag5/Ag9. Geometrical restraints were applied to maintain reasonable bond lengths and angles, and anisotropic

displacement parameters (ADPs) were constrained using SIMU and RIGU instructions to ensure physically reasonable thermal motion.

**CCDC codes:** Detailed crystal data for **Ag<sub>14</sub>**, **(AgCu)<sub>14</sub>-1**, and **(AgCu)<sub>14</sub>-2** NCs are given in Tables S1, S2, and S3, respectively. CCDC 2413802 for **Ag<sub>14</sub>**, CCDC 2413803 for **(AgCu)<sub>14</sub>-1**, and CCDC 2413801 for **(AgCu)<sub>14</sub>-2** contain the supplementary crystallographic data for this paper. These data are provided free of charge by the Cambridge Crystallographic Data Centre.

### III. Electrochemical measurements

To explore the effect of the increase in the number of Cu atoms in catalysis, we conducted eCO<sub>2</sub>RR. The catalyst sample was prepared by loading NCs onto Ketjen Carbon (C) at a mass ratio of 1:1 (5 mg NC and 5 mg C), which was subsequently dispersed in isopropyl alcohol at a concentration of 2.5 mg·mL<sup>-1</sup> under sonication for 10 mins. The final catalyst ink was prepared by thoroughly mixing 1 mL of catalyst suspension with 10 μL of Nafion (5 wt.%). Working electrodes were fabricated by casting 40 μL of this ink onto the effective contact area (2 × 0.5 cm<sup>2</sup>) of carbon paper (2 × 1.5 cm<sup>2</sup>), which was subsequently dried at room temperature. 1 M KOH solution (pH = 14). All electrochemical tests were carried out in a customized flow cell. The electrochemical performance of three catalysts on a gas diffusion electrode (GDE, 2 × 1.5 cm<sup>2</sup>) was tested in a flow cell reactor. The three NC-coated carbon paper with a microporous layer (Sigracet 29 BCE, Fuel Cell Store) was applied as the GDE cathode. Hg/HgO in 1.0 M KOH saturated aqueous electrolyte was employed as the reference electrode. During the measurement process, the flow rate of CO<sub>2</sub> into the cathode GDE was 20 mL·min<sup>-1</sup>, and the flow rate of the cathode liquid (1 M KOH) was 40 rpm, which was controlled by a peristaltic pump (Cole-Parmer). The electroreduction CO<sub>2</sub> testing was carried out using the potentiostat of Donghua DH7001B. The gaseous products in the electrochemical CO<sub>2</sub> reduction reaction were detected by gas chromatography (GC), and the liquid products were detected by <sup>1</sup>H NMR.

$$E(RHE) = E(Hg/HgO) + 0.098 + 0.0592 * 14$$

The faradaic efficiency ( $FE_X$ ) and partial current density ( $j_X$ ) of X (X= CO or H<sub>2</sub>) were calculated as below:

$$FE_X = \frac{(N_i \times n \times F)}{Q_t}$$

$$j_X = \frac{FE_X \times Q_t}{t \times \text{Area}}$$

Where

$Q_t$  = total charge consumed in the electrochemical reaction.

$N_i$  = the number of moles of the product (measured by GC).

$n$  = the number of electrons transferred in the elementary reaction ( $n$  is 2 for CO and H<sub>2</sub>).

$F$  = the Faradaic constant (96485 C mol<sup>-1</sup>).

$t$  = reaction time (s).

Area = geometry area of the electrode (1 cm<sup>2</sup>).

At each potential, 400  $\mu\text{L}$  of the electrolyzed catholyte was collected, and 200  $\mu\text{L}$  of  $\text{D}_2\text{O}$  containing DMSO as an internal standard was added. The product peak area was calculated using software, and the Faraday efficiency ( $\text{FE}_{\text{liquid}}$ ) of the liquid product was calculated using the following formula:

$$n_{\text{formate}} = \frac{n_{\text{DMSO}} \times n_1 \times S_1}{n_2 \times S_2}$$

$$\text{FE}_{\text{formate}} = \frac{n_{\text{foemate}} \times F \times n}{Q_t \times n_3} \times 100\%$$

Where

$n_{\text{DMSO}}$  = The amount of the substance of the internal standard DMSO (0.00063 mmol).

$n_1$  = Amount of methyl ( $-\text{CH}_3$ ) hydrogen on dimethyl sulfoxide ( $n_1 = 6$ ).

$n_2$  = The amount of hydrogen in the liquid product.

$n_3$  = The ratio of cathode reaction solution to total catholyte taken when configuring  $^1\text{H}$  NMR ( $n_3 = 0.01$ ).

$S_1$  = Software calculates the liquid peak area based on the DMSO peak area.

$S_2$  = The DMSO peak area in the software is set to 1.

$F$  = the Faradaic constant ( $96485 \text{ C mol}^{-1}$ ).

$n$  = the number of electrons transferred in the elementary reaction.

$Q_t$  = total charge consumed in the electrochemical reaction.

After the  $\text{eCO}_2\text{RR}$  tests were completed, the samples were rinsed with  $\text{CH}_2\text{Cl}_2$  and collected for UV-vis characterization.

#### IV. DFT calculations

Periodic DFT calculations were performed with the VASP code using the Perdew-Burke-Ernzerhof exchange-correlation function of the generalized gradient approximation (GGA). Projector augmented wave (PAW) pseudopotential was used to describe core-valence interactions, with  $[\text{Ag}]-5s^14d^{10}$  and  $[\text{Cu}]-4s^13d^{10}$  as valence electrons. The plane-wave cutoff energy was set to 400 eV. The Brillouin zone of the reciprocal space was sampled with the  $\Gamma$ -centred Monkhorst-Pack scheme, the k-point mesh was set to  $1 \times 1 \times 1$  for the geometry optimization. The energy convergence of the self-consistent iteration reached  $10^{-5}$  eV per atom, and the Hermann-Feynman force convergence was  $0.03 \text{ eV } \text{\AA}^{-1}$ , ensuring that the structure optimization process converged to a stable structure.

The computational hydrogen electrode (CHE) model was used to calculate the Gibbs free energy of the electrochemical and non-electrochemical elementary steps involved in ECR, defined as:

$$\Delta G = \Delta E - T\Delta S + \Delta \text{ZPE}$$

Here,  $\Delta E$  is the difference in the total energy of the reaction of the elementary steps as calculated by the DFT in vacuum.  $T\Delta S$  and  $\Delta \text{ZPE}$  are the entropy and zero-point energy changes at 298.15 K, respectively.

## Section 2. Supporting Figures

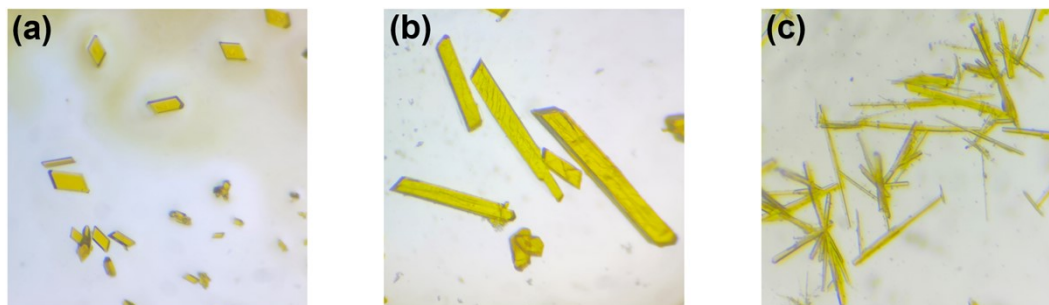

**Fig. S1** The optical microscopic image of the single crystals of  $\text{Ag}_{14}$ ,  $(\text{AgCu})_{14-1}$ , and  $(\text{AgCu})_{14-2}$  NCs. (a)  $\text{Ag}_{14}$ ; (b)  $(\text{AgCu})_{14-1}$ ; (c)  $(\text{AgCu})_{14-2}$ .

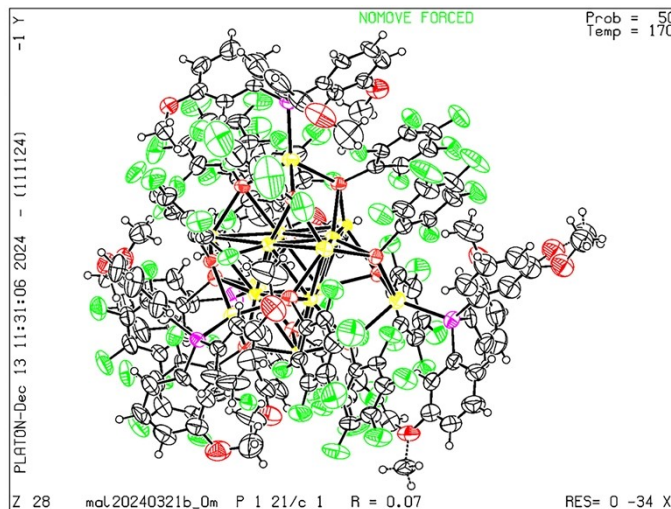

**Fig. S2** The thermal ellipsoids of the ORTEP diagram of the  $\text{Ag}_{14}$  cluster.

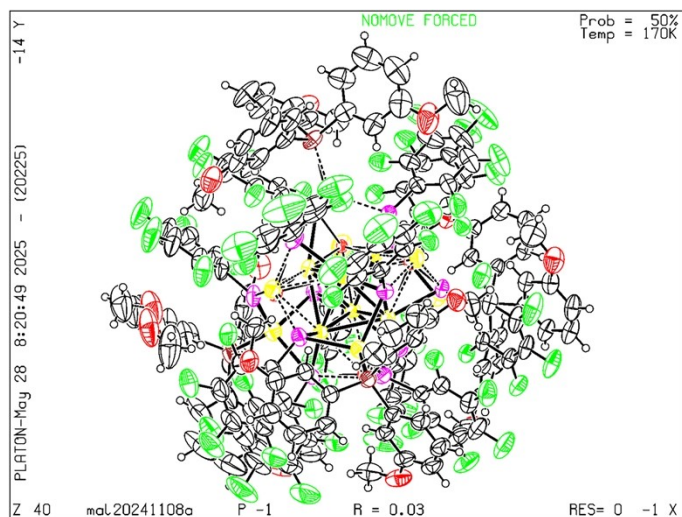

**Fig. S3** The thermal ellipsoids of the ORTEP diagram of the  $(\text{AgCu})_{14}\text{-1}$  cluster.

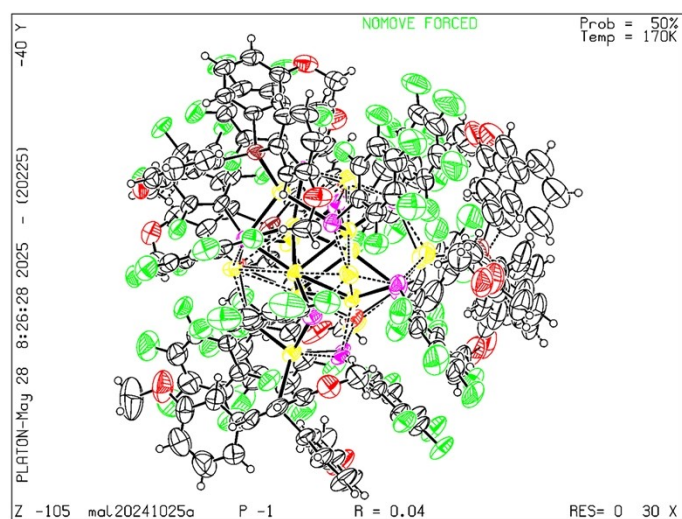

**Fig. S4** The thermal ellipsoids of the ORTEP diagram of the  $(\text{AgCu})_{14}\text{-2}$  cluster.



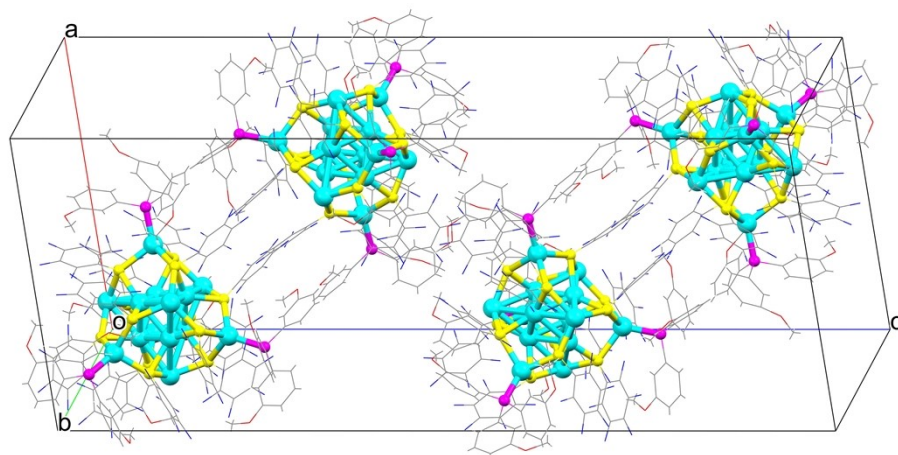

**Fig. S5** The presence of four  $\text{Ag}_{14}$  cluster molecules in a unit cell. Color labels: turquoise = Ag; yellow = S; magenta = P; blue = F; pink = O; grey = C; white = H.

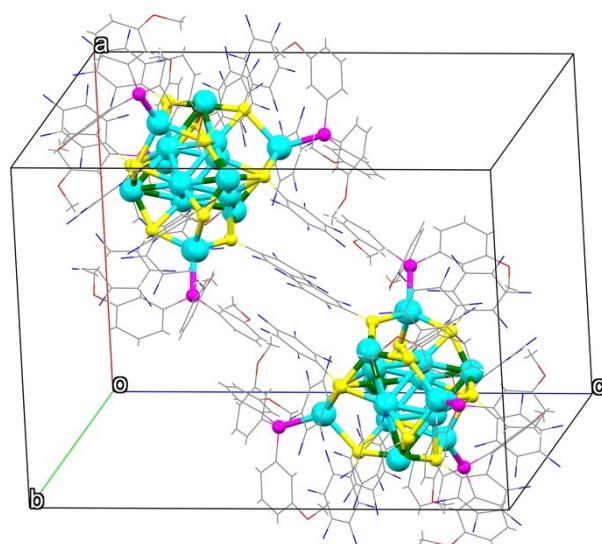

**Fig. S6** The presence of two  $(\text{AgCu})_{14-1}$  cluster molecules in a unit cell. Color labels: turquoise = Ag; green = Cu; yellow = S; magenta = P; blue = F; pink = O; grey = C; white = H.

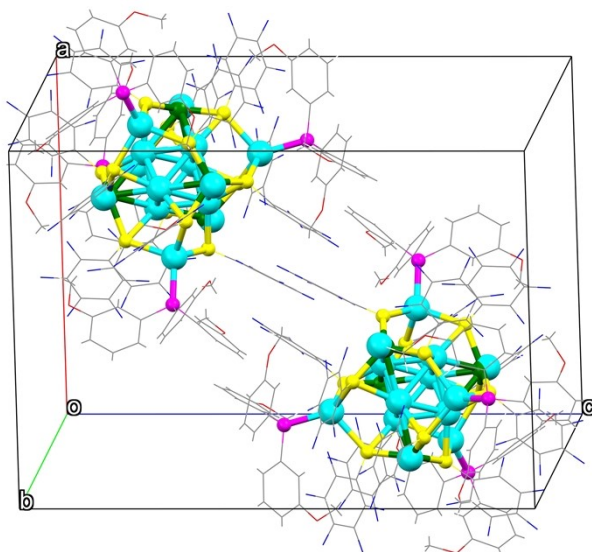

**Fig. S7** The presence of two  $(\text{AgCu})_{14-2}$  cluster molecules in a unit cell. Color labels: turquoise = Ag; green = Cu; yellow = S; magenta = P; blue = F; pink = O; grey = C; white = H.

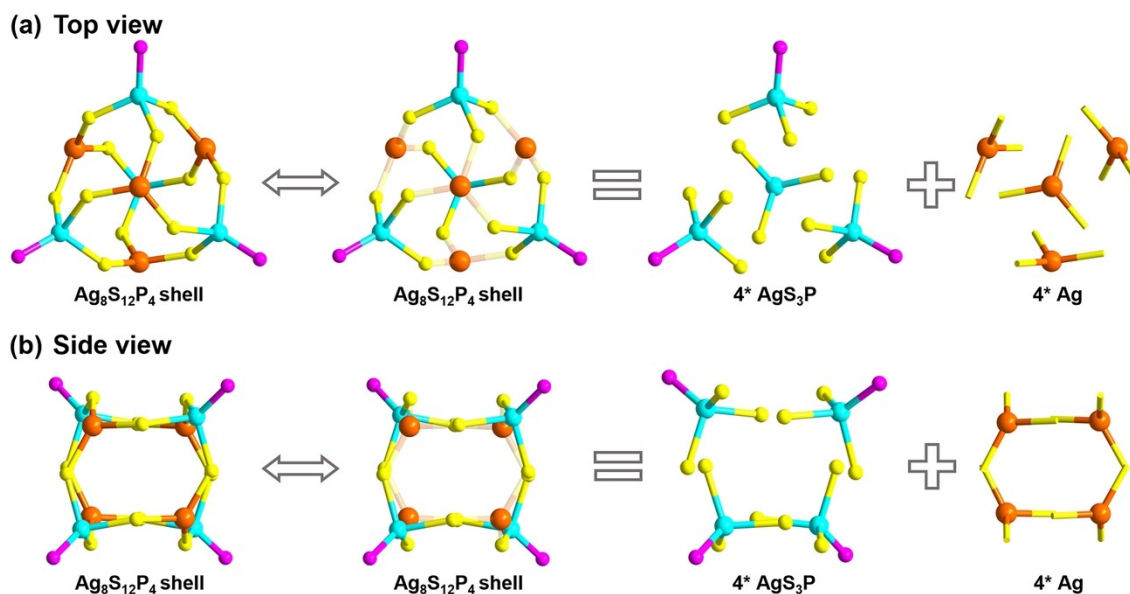

**Fig. S8** Structural analysis of  $\text{Ag}_8\text{S}_{12}\text{P}_4$  shell. (a) and (b) Top and side views of the  $\text{Ag}_8\text{S}_{12}\text{P}_4$  shell consisting of four  $\text{AgS}_3\text{P}$  motifs and four Ag atoms. Color labels: turquoise/orange = Ag; yellow = S; magenta = P.

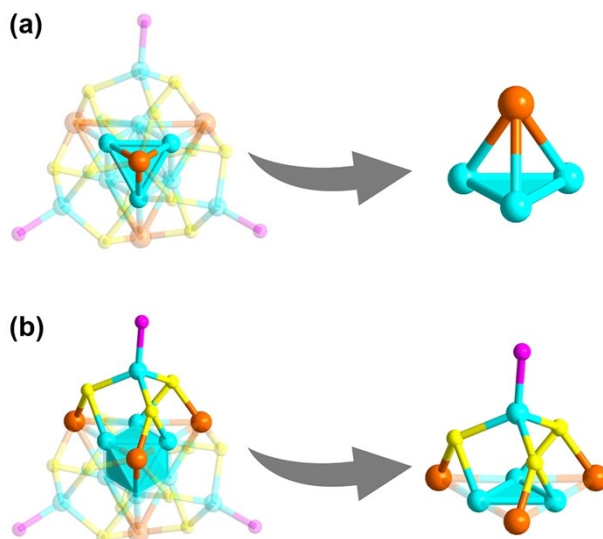

**Fig. S9** The coordination modes of Ag atoms in **Ag<sub>14</sub>** NC. (a) The  $\mu_3$  (Ag, Ag, Ag, Ag) coordination modes of four Ag atoms on the core surface of the Ag<sub>6</sub> core. (b) The  $\mu_2$  (S, Ag, Ag) coordination modes of twelve S atoms on the core surface of the Ag<sub>6</sub> core. Color labels: turquoise/orange = Ag; yellow = S; magenta = P.

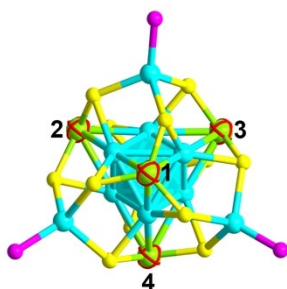

|                   | (AgCu) <sub>14</sub> -1 |       | (AgCu) <sub>14</sub> -2 |        |
|-------------------|-------------------------|-------|-------------------------|--------|
| Site              | Ag%                     | Cu%   | Ag%                     | Cu%    |
| 1                 | 34.6%                   | 65.4% | 13.3%                   | 86.7%  |
| 2                 | 15.4%                   | 84.6% | 11.3%                   | 88.7%  |
| 3                 | 34.6%                   | 65.4% | 13.7%                   | 86.3%  |
| 4                 | 34.6%                   | 65.4% | 8.0 %                   | 92.0 % |
| Total metal atoms | 1.192                   | 2.808 | 0.463                   | 3.537  |

**Fig. S10** The occupancy information of metal sites 1-4 in **(AgCu)<sub>14</sub>-1** and **(AgCu)<sub>14</sub>-2** NCs. Color labels: turquoise = Ag; light green = Ag/Cu; yellow = S; magenta = P.

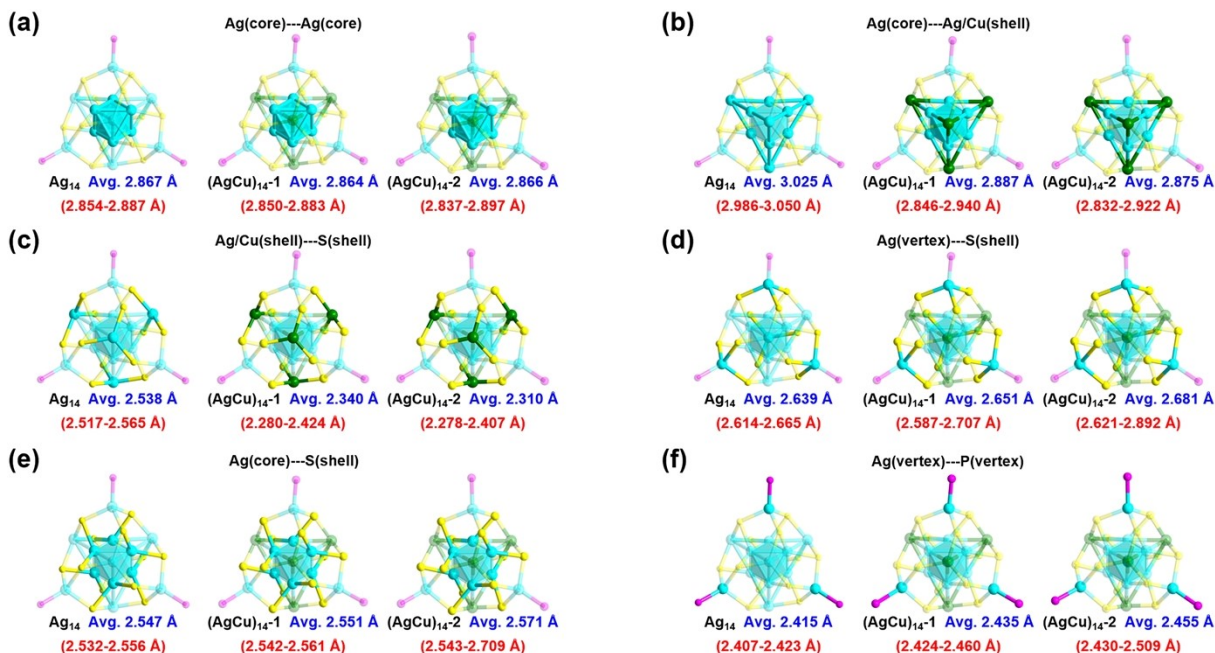

**Fig. S11** Structural comparison and bond length among  $\text{Ag}_{14}$ ,  $(\text{AgCu})_{14-1}$ , and  $(\text{AgCu})_{14-2}$  NCs. (a) Comparison of the bond length of Ag(core)---Ag(core); (b) Comparison of the bond length of Ag(core)---Ag/Cu(shell); (c) Comparison of the bond length of Ag/Cu(shell)---S(shell); (d) Comparison of the bond length of Ag(vertex)---S(shell); (e) Comparison of the bond length of Ag(core)---S(shell); (f) Comparison of the bond length of Ag(vertex)---P(vertex). Color labels: turquoise = Ag; green = Cu; yellow = S; magenta = P. The introduction of Cu alters bond lengths in the  $\text{Ag}_{14}$  NC. Specifically, we analyzed bond lengths involving Cu at the four disordered sites. The average Ag-Ag distance in the  $\text{Ag}_6$  core is 2.867, 2.864, and 2.866 Å, slightly shorter than the 2.889 Å in bulk silver, indicating strong interactions between the core Ag (Fig. S11a). After Cu incorporation, the Ag-Ag/Cu bond lengths between shell Ag/Cu atoms and core Ag atoms decrease from 3.025 Å in  $\text{Ag}_{14}$  to 2.887 Å in  $(\text{AgCu})_{14-1}$ , and 2.875 Å in  $(\text{AgCu})_{14-2}$ , due to Cu's smaller radius (Fig. S11b). The Ag/Cu-S bond lengths between shell Ag/Cu atoms and the S atoms in the  $\text{AgS}_3\text{P}$  unit also decrease from 2.538 Å in  $\text{Ag}_{14}$  to 2.310 Å in  $(\text{AgCu})_{14-2}$  (Fig. S11c). Cu doping also further affects both the metal-thiolate and the P-metal bond distances (Fig. S11d-f). For example, in  $(\text{AgCu})_{14-2}$ , the P-Ag distance is 2.455 Å, longer than 2.435 Å in  $(\text{AgCu})_{14-1}$  and 2.415 Å in  $\text{Ag}_{14}$ .



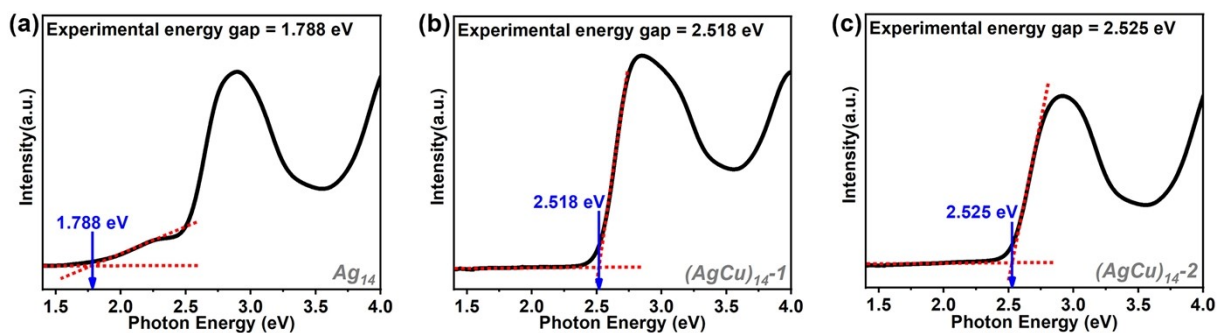

**Fig. S12** UV-vis absorption spectra (photon energy scale) of the  $\text{Ag}_{14}$ ,  $(\text{AgCu})_{14-1}$ , and  $(\text{AgCu})_{14-2}$  NCs in  $\text{CH}_2\text{Cl}_2$ . (a)  $\text{Ag}_{14}$ ; (b)  $(\text{AgCu})_{14-1}$ ; (c)  $(\text{AgCu})_{14-2}$ . The experimental energy gap of the  $\text{Ag}_{14}$ ,  $(\text{AgCu})_{14-1}$ , and  $(\text{AgCu})_{14-2}$  NCs in  $\text{CH}_2\text{Cl}_2$  was determined as  $\sim 1.788$  eV,  $2.518$  eV, and  $2.525$  eV, respectively.

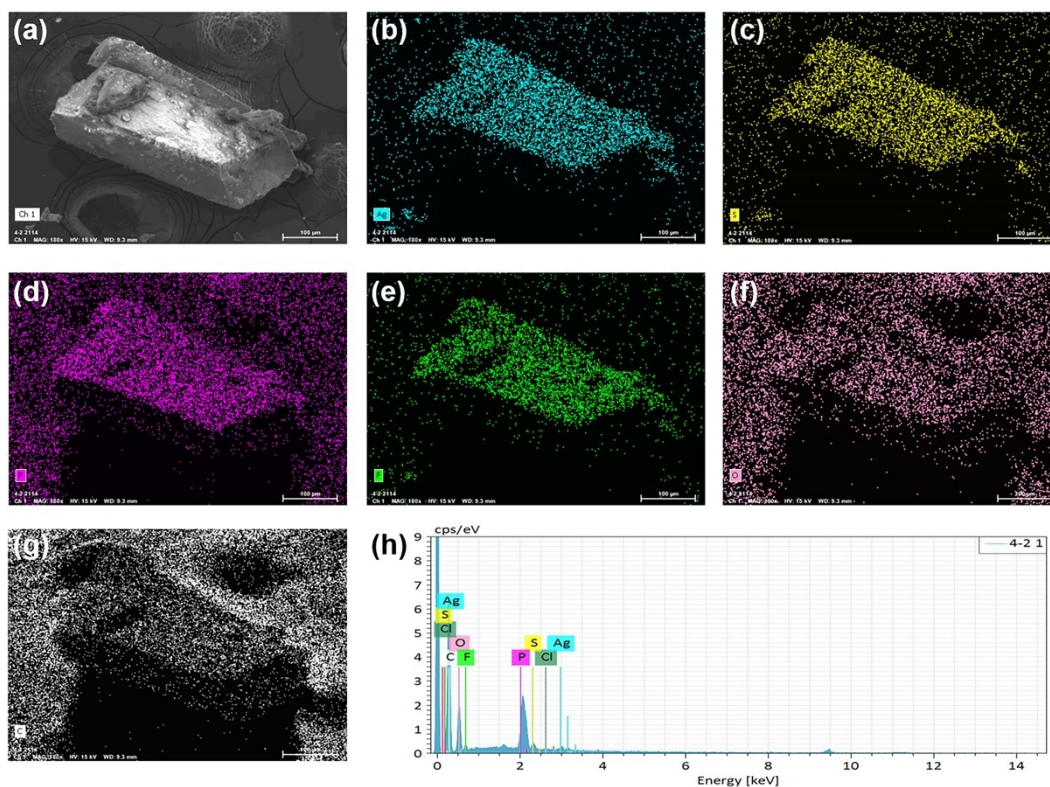

**Fig. S13** SEM image and corresponding elemental mapping images of the  $\text{Ag}_{14}$  crystals. (a) SEM image of single crystal; (b)-(g) Elemental mapping images of Ag, S, P, F, O, and C elements, respectively; (h) EDS spectrum confirming the presence of above elements (Ag, S, P, F, O, and C) in  $\text{Ag}_{14}$  NC.

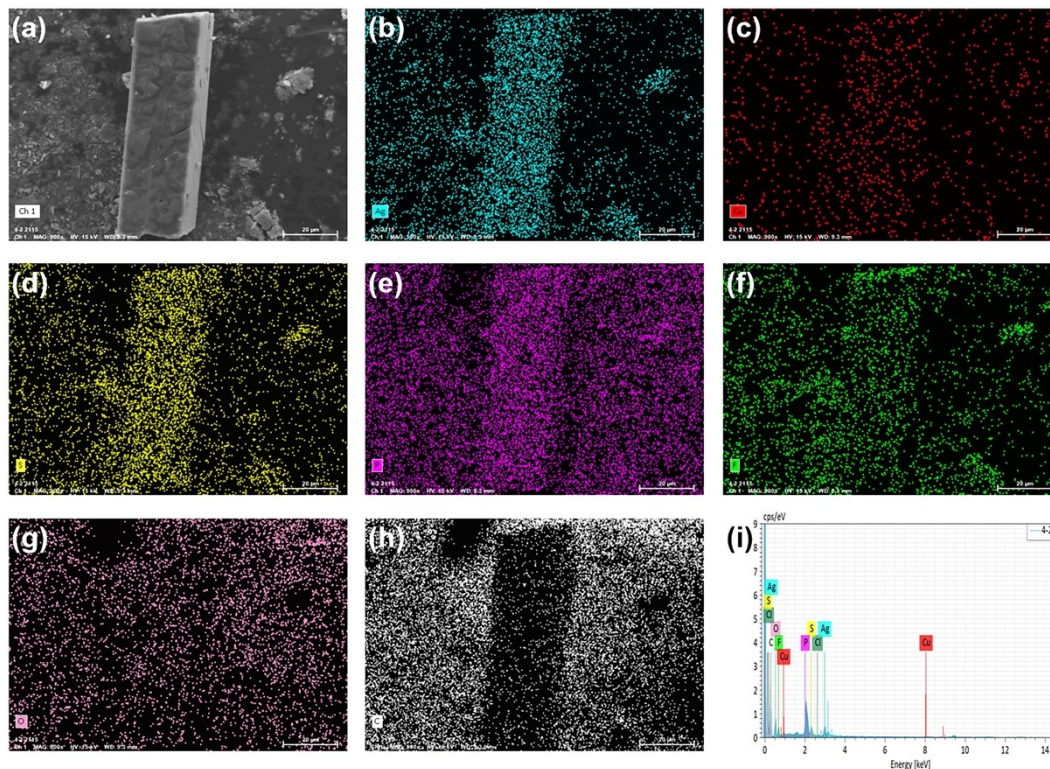

**Fig. S14** SEM image and corresponding elemental mapping images of the  $(\text{AgCu})_{14-1}$  crystals. (a) SEM image of single crystal; (b)-(h) Elemental mapping images of Ag, Cu, S, P, F, O, and C elements, respectively; (i) EDS spectrum confirming the presence of above elements (Ag, Cu, S, P, F, O, and C) in  $\text{Ag}_{12}\text{Cu}_2$  NC.



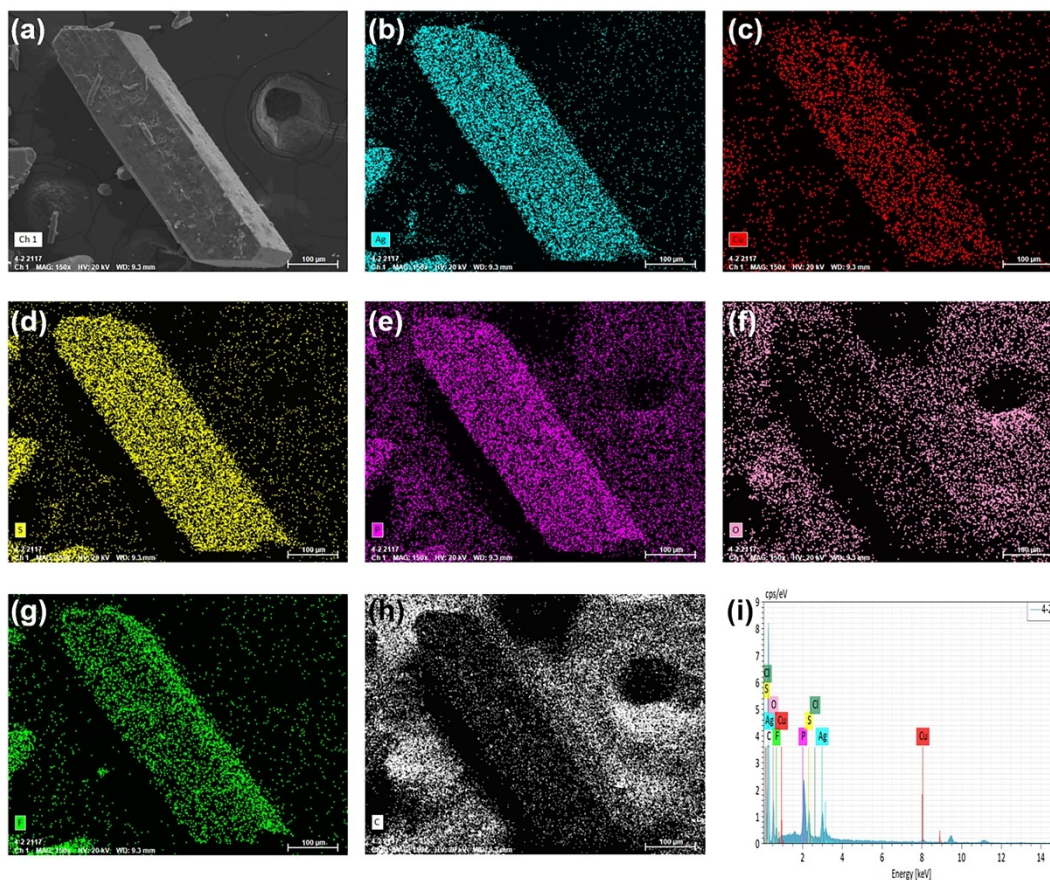

**Fig. S15** SEM image and corresponding elemental mapping images of the  $(\text{AgCu})_{14-2}$  crystals. (a) SEM image of single crystal; (b)-(h) Elemental mapping images of Ag, Cu, S, P, F, O, and C elements, respectively; (i) EDS spectrum confirming the presence of above elements (Ag, Cu, S, P, F, O, and C) in  $\text{Ag}_{10}\text{Cu}_4$  NC.

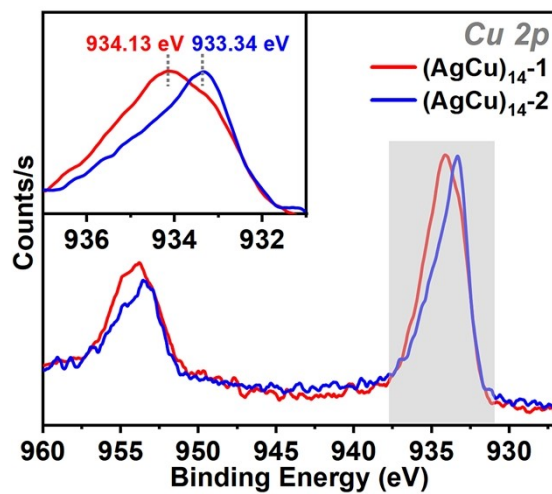

**Fig. S16** Cu 2p spectra of (AgCu)<sub>14-1</sub> (red) and (AgCu)<sub>14-2</sub> (blue) NCs. Insets: photographs of the corresponding partial enlargement.

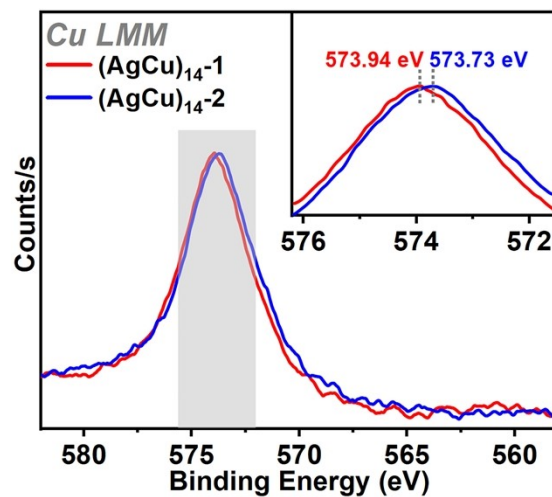

**Fig. S17** The Cu LMM Auger spectra of the (AgCu)<sub>14-1</sub> (red) and (AgCu)<sub>14-2</sub> (blue) NCs. Insets: photographs of the corresponding partial enlargement.



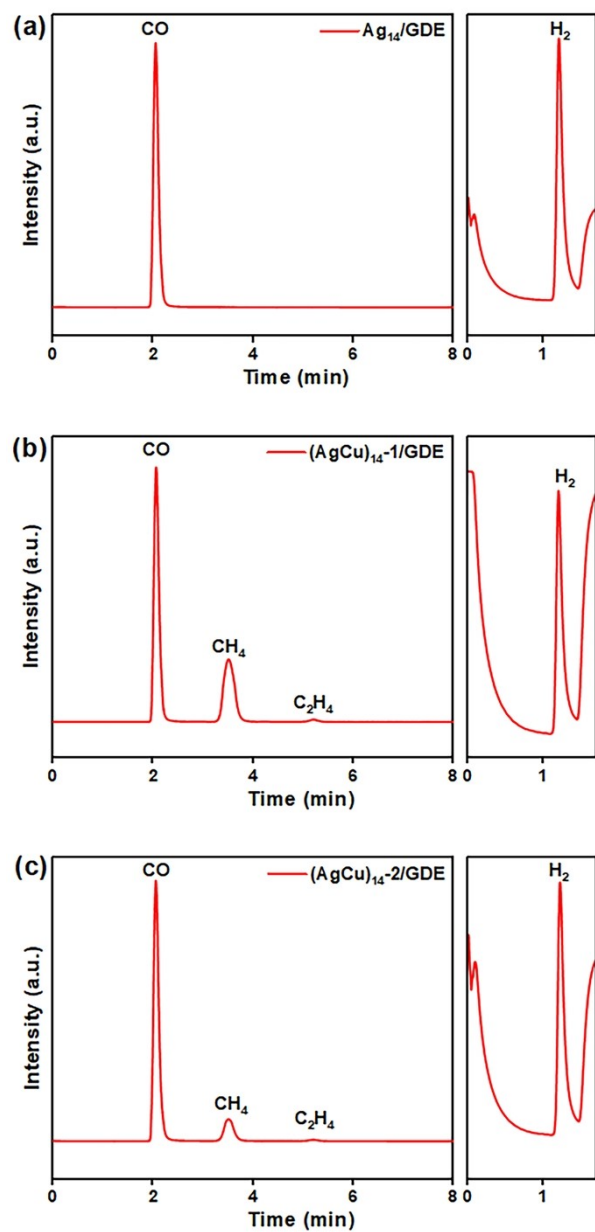

**Fig. S18** Gas products (CO, CH<sub>4</sub>, C<sub>2</sub>H<sub>4</sub>, and H<sub>2</sub>) analysis for eCO<sub>2</sub>RR on (a) Ag<sub>14</sub>/GDE, (b) (AgCu)<sub>14</sub>-1/GDE, and (c) (AgCu)<sub>14</sub>-2/GDE. Gas chromatography showing the gas products of eCO<sub>2</sub>RR at -1.6 V vs. RHE.

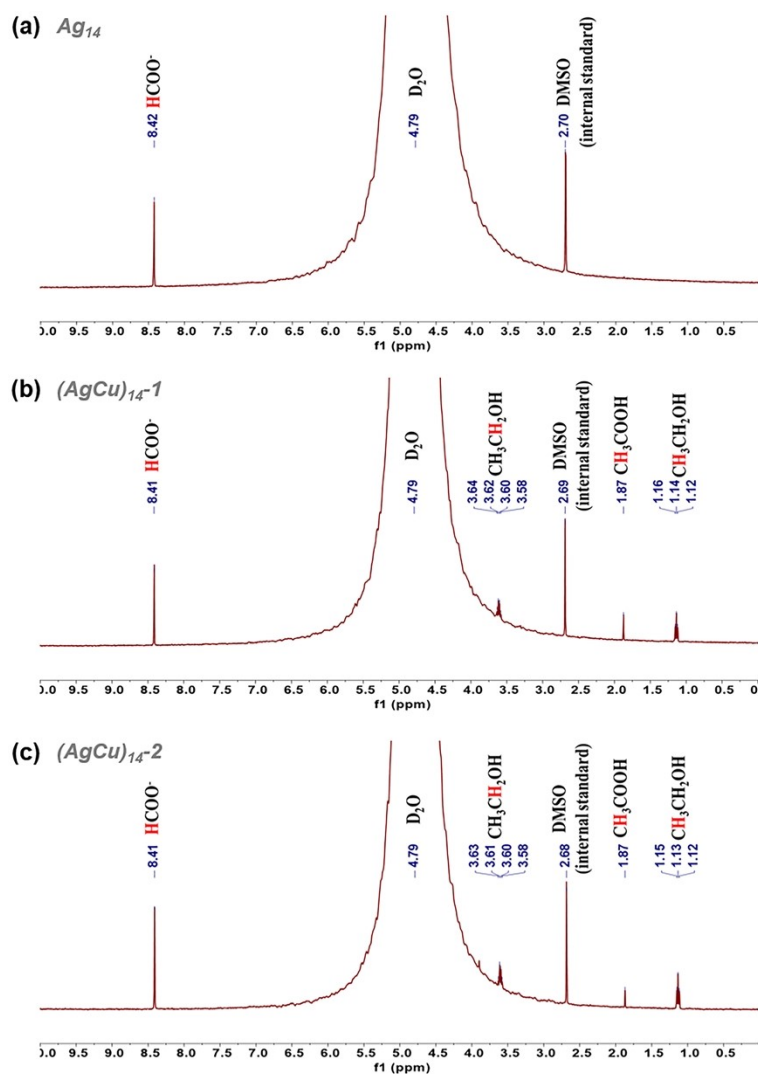

**Fig. S19**  $^1\text{H}$ -NMR spectral data of liquid products for the  $Ag_{14}/\text{GDE}$ ,  $(AgCu)_{14-1}/\text{GDE}$ , and  $(AgCu)_{14-2}/\text{GDE}$  catalysts. (a)  $Ag_{14}/\text{GDE}$ ; (b)  $(AgCu)_{14-1}/\text{GDE}$ ; (c)  $(AgCu)_{14-2}/\text{GDE}$ .

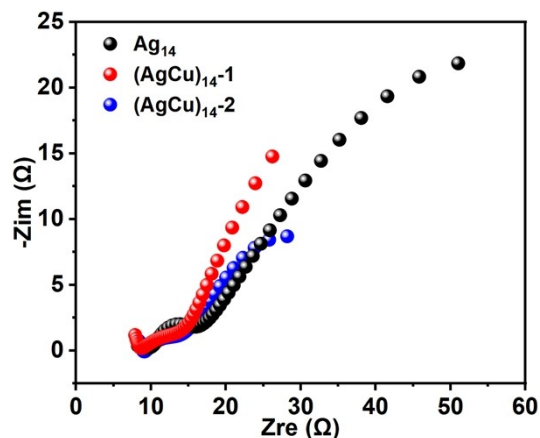

**Fig. S20** Electrochemical impedance spectra of the  $\text{Ag}_{14}/\text{GDE}$ ,  $(\text{AgCu})_{14-1}/\text{GDE}$ , and  $(\text{AgCu})_{14-2}/\text{GDE}$  catalysts.

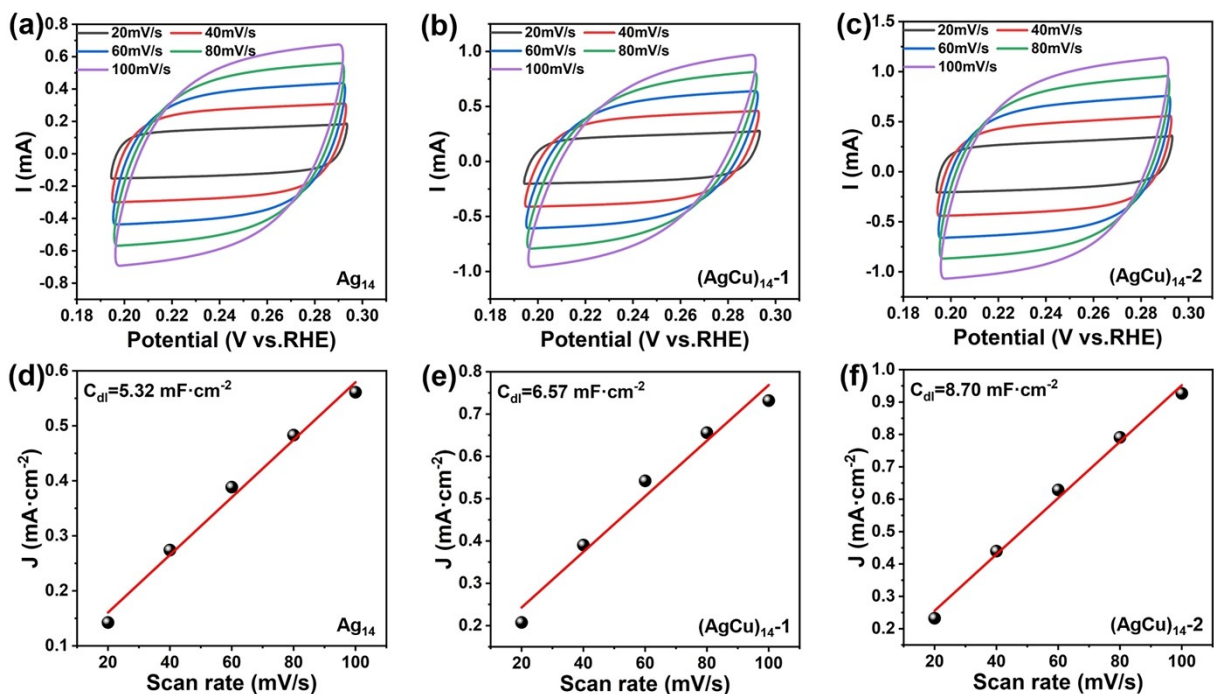

**Fig. S21** Cyclic voltammetry of (a)  $\text{Ag}_{14}/\text{GDE}$ , (b)  $(\text{AgCu})_{14-1}/\text{GDE}$ , and (c)  $(\text{AgCu})_{14-2}/\text{GDE}$  catalysts in 1 M KOH electrolyte at a scan rate from 20, 40, 60, 80, and 100  $\text{mV}\cdot\text{s}^{-1}$ ; The corresponding linear curves of current density and scan rate of (d)  $\text{Ag}_{14}/\text{GDE}$ , (e)  $(\text{AgCu})_{14-1}/\text{GDE}$ , and (f)  $(\text{AgCu})_{14-2}/\text{GDE}$  catalysts.

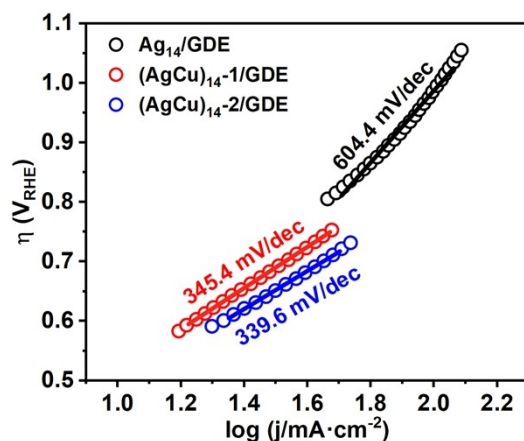

Fig. S22 Tafel plots constructed for the eCO<sub>2</sub>RR on the three catalysts.

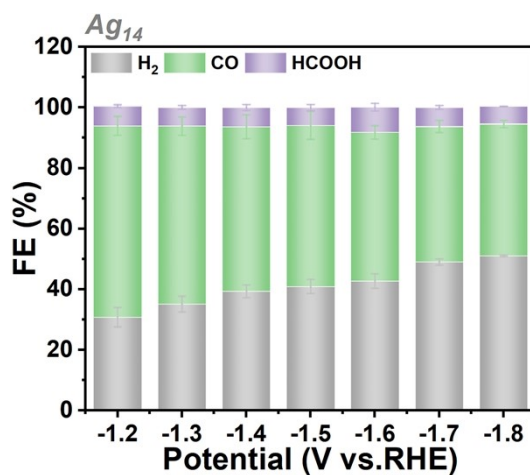

Fig. 23 FEs for various eCO<sub>2</sub>RR products obtained on Ag<sub>14</sub>/GDE catalyst in a 1 M KOH solution.

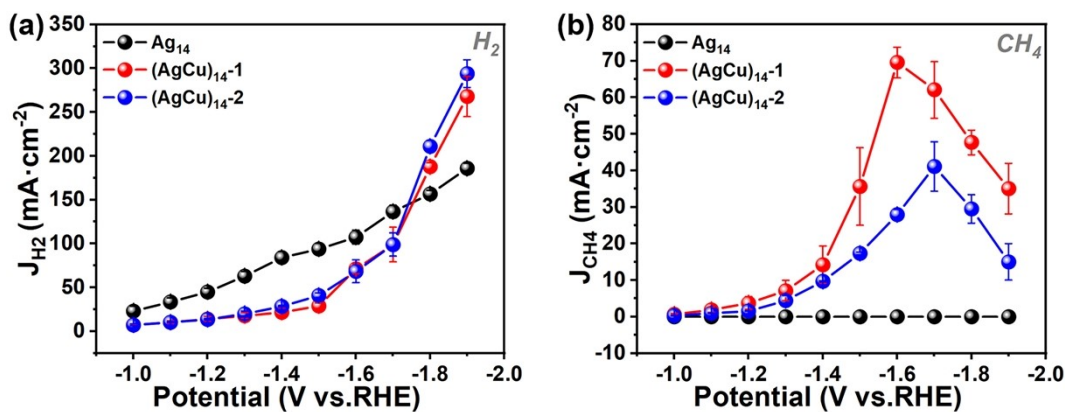

Fig. S24 H<sub>2</sub> and CH<sub>4</sub> partial current density of the Ag<sub>14</sub>/GDE (black), (AgCu)<sub>14</sub>-1/GDE (red), and (AgCu)<sub>14</sub>-2/GDE (blue) catalysts at different potentials. (a) H<sub>2</sub>; (b) CH<sub>4</sub>.

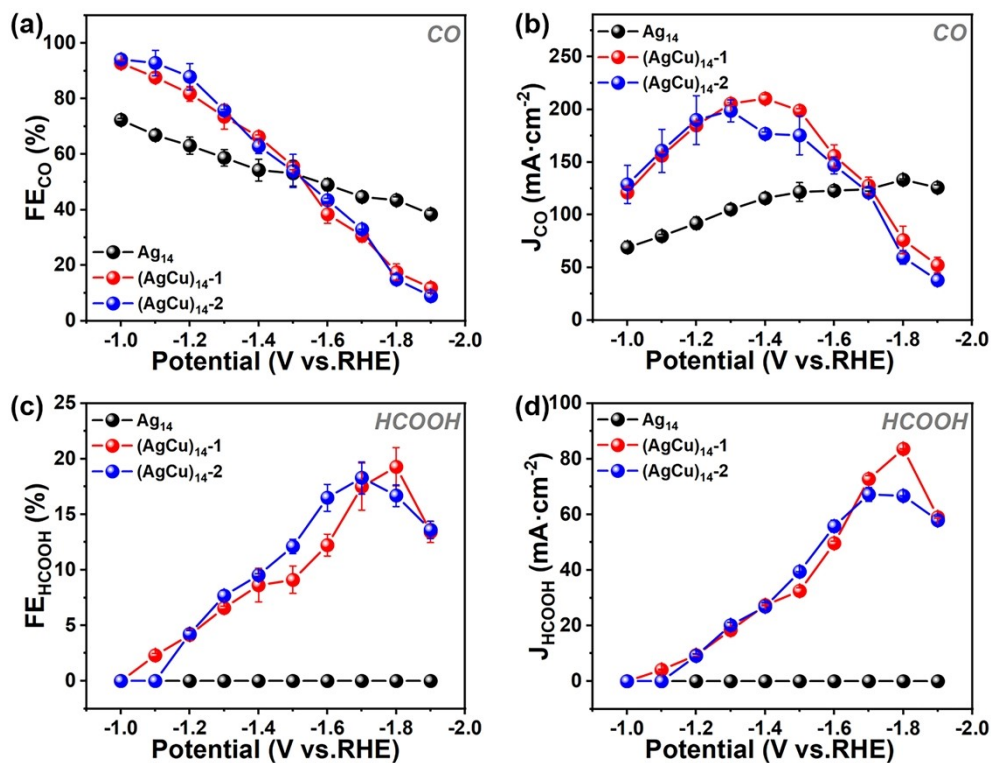

**Fig. S25** CO and HCOOH faradaic efficiency and partial current density of the  $\text{Ag}_{14}/\text{GDE}$  (black),  $(\text{AgCu})_{14-1}/\text{GDE}$  (red), and  $(\text{AgCu})_{14-2}/\text{GDE}$  (blue) catalysts at different potentials. (a) CO faradaic efficiency; (b) CO partial current density; (c) HCOOH faradaic efficiency; (d) HCOOH partial current density.

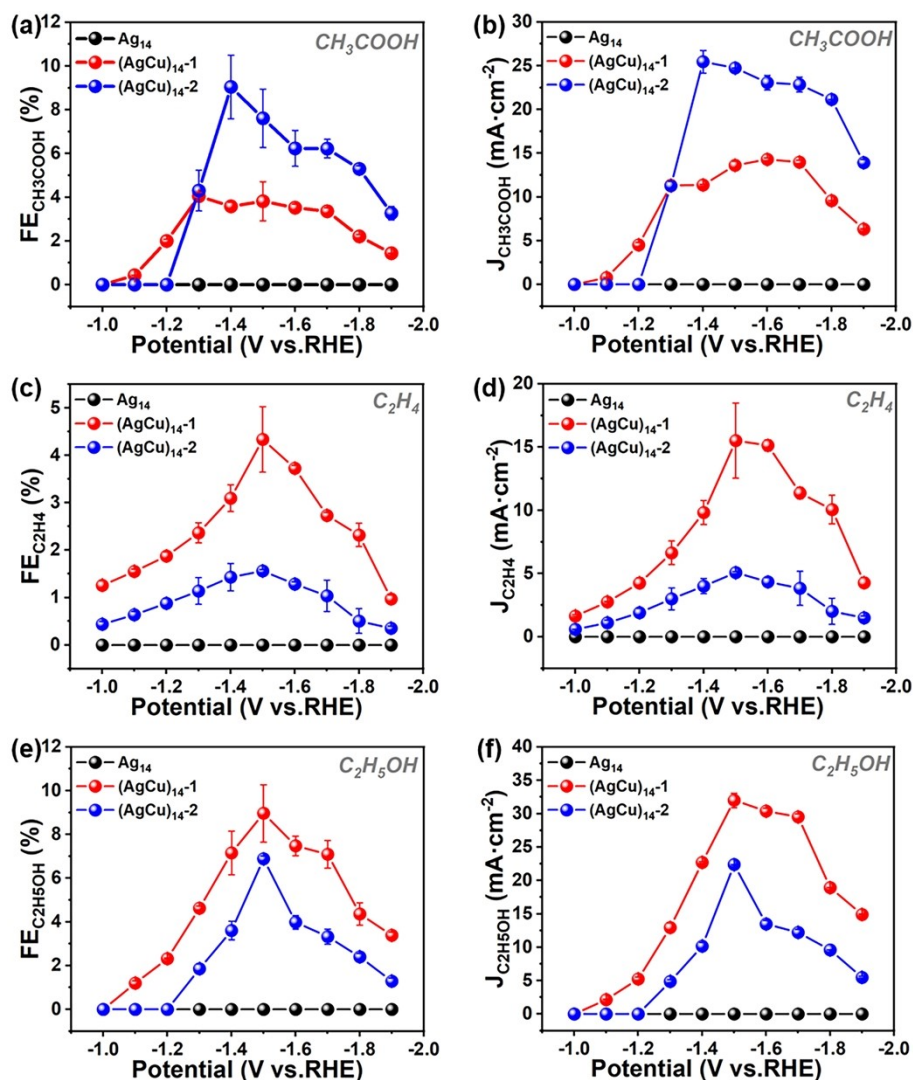

**Fig. S26**  $\text{CH}_3\text{COOH}$ ,  $\text{C}_2\text{H}_4$ , and  $\text{C}_2\text{H}_5\text{OH}$  faradaic efficiency and partial current density of the  $\text{Ag}_{14}/\text{GDE}$  (black),  $(\text{AgCu})_{14-1}/\text{GDE}$  (red), and  $(\text{AgCu})_{14-2}/\text{GDE}$  (blue) catalysts at different potentials. (a)  $\text{CH}_3\text{COOH}$  faradaic efficiency; (b)  $\text{CH}_3\text{COOH}$  partial current density; (c)  $\text{C}_2\text{H}_4$  faradaic efficiency; (d)  $\text{C}_2\text{H}_4$  partial current density; (e)  $\text{C}_2\text{H}_5\text{OH}$  faradaic efficiency; (f)  $\text{C}_2\text{H}_5\text{OH}$  partial current density.

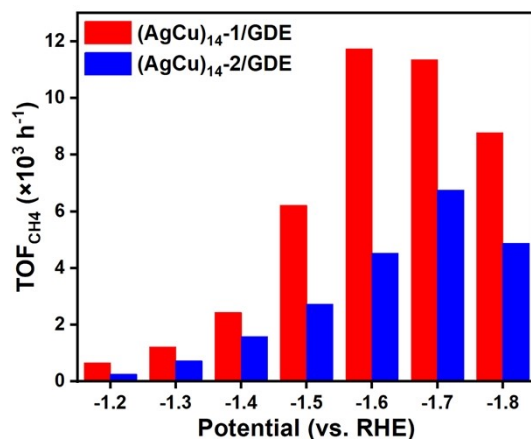

**Fig. S27** The turnover frequency of CH<sub>4</sub> products was obtained from (AgCu)<sub>14</sub>-1/GDE and (AgCu)<sub>14</sub>-2/GDE.

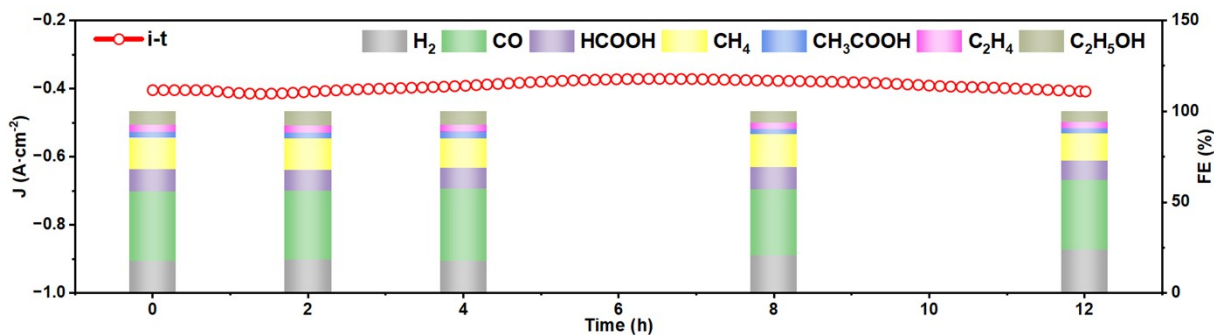

**Fig. S28** Catalytic stability of (AgCu)<sub>14</sub>-1/GDE at -1.6 V vs. RHE for 12 h, (top) *i*-*t* curve; (bottom) selectivity of various eCO<sub>2</sub>RR products at different time.

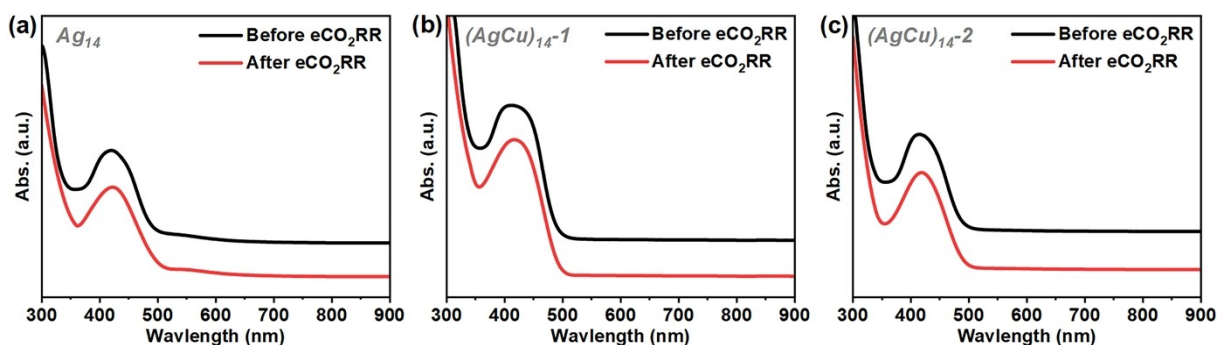

**Fig. S29** UV-vis absorbance spectra of the Ag<sub>14</sub>, (AgCu)<sub>14</sub>-1, and (AgCu)<sub>14</sub>-2 NCs before and after eCO<sub>2</sub>RR. (a) Ag<sub>14</sub>; (b) (AgCu)<sub>14</sub>-1; (c) (AgCu)<sub>14</sub>-2.



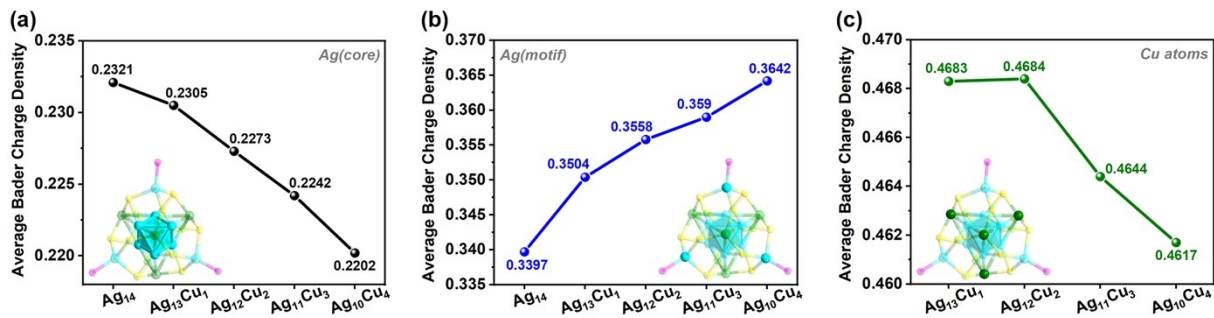

**Fig. S30** The average Bader charge densities of the Ag atoms in Ag<sub>6</sub> core, the Ag atoms in AgS<sub>3</sub>P motifs, and the Cu atoms of the Ag<sub>14-x</sub>Cu<sub>x</sub> (x=0-4) structure. (a) Ag(core); (b) Ag(motif); (c) Cu atoms. Color labels (as illustrated by the Ag<sub>10</sub>Cu<sub>4</sub> structure): turquoise = Ag; green = Ag/Cu; yellow = S; magenta = P.

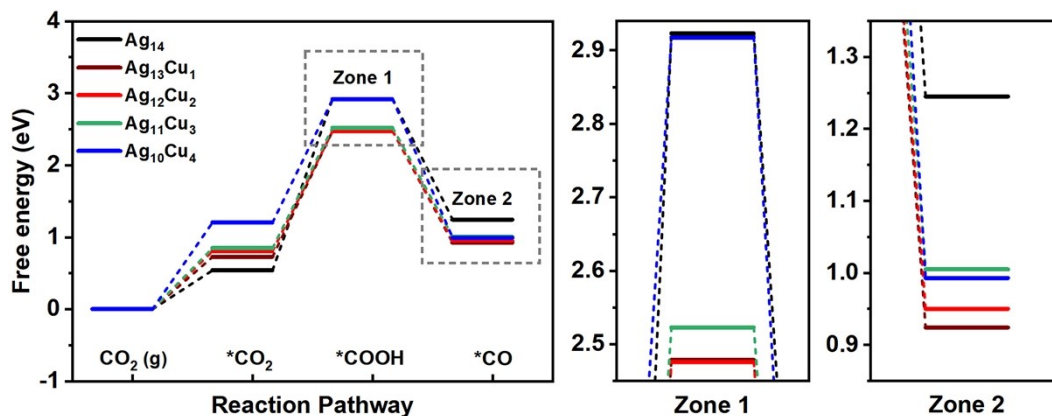

**Fig. S31** Calculated the free energy diagram for \*CO<sub>2</sub>, \*COOH, and \*CO intermediates on the Ag<sub>14-x</sub>Cu<sub>x</sub> (x = 0/1/2/3/4).



### Section 3. Supporting Table

**Table S1** The crystal structure parameters for **Ag<sub>14</sub>**.

|                                                      |                                                                                                                  |
|------------------------------------------------------|------------------------------------------------------------------------------------------------------------------|
| Empirical formula                                    | C <sub>156</sub> H <sub>84</sub> Ag <sub>14</sub> F <sub>60</sub> O <sub>12</sub> P <sub>4</sub> S <sub>12</sub> |
| Formula weight                                       | 5481.40                                                                                                          |
| Temperature/K                                        | 170                                                                                                              |
| Crystal system                                       | monoclinic                                                                                                       |
| Space group                                          | <i>P</i> 2 <sub>1</sub> / <i>c</i>                                                                               |
| <i>a</i> /Å                                          | 19.3202(8)                                                                                                       |
| <i>b</i> /Å                                          | 19.1149(7)                                                                                                       |
| <i>c</i> /Å                                          | 27.840(19)                                                                                                       |
| $\alpha$ /°                                          | 90                                                                                                               |
| $\beta$ /°                                           | 95.3950(10)                                                                                                      |
| $\gamma$ /°                                          | 90                                                                                                               |
| Volume/Å <sup>3</sup>                                | 18082.2(13)                                                                                                      |
| <i>Z</i>                                             | 4                                                                                                                |
| $\rho_{\text{calc}}$ /cm <sup>3</sup>                | 2.013                                                                                                            |
| $\mu$ /mm <sup>-1</sup>                              | 1.803                                                                                                            |
| <i>F</i> (000)                                       | 10629.0                                                                                                          |
| Radiation                                            | Mo K $\alpha$ ( $\lambda$ = 0.71073)                                                                             |
| 2 $\Theta$ range for data collection/°               | 3.772 to 50                                                                                                      |
| Index ranges                                         | -22 ≤ <i>h</i> ≤ 22, -22 ≤ <i>k</i> ≤ 21, -58 ≤ <i>l</i> ≤ 58                                                    |
| Reflections collected                                | 191046                                                                                                           |
| Independent reflections                              | 31803 [ <i>R</i> <sub>int</sub> = 0.0503, <i>R</i> <sub>sigma</sub> = 0.0421]                                    |
| Data/restraints/parameters                           | 31803/3973/2341                                                                                                  |
| Goodness-of-fit on <i>F</i> <sup>2</sup>             | 1.197                                                                                                            |
| Final <i>R</i> indexes [ <i>I</i> ≥ 2σ ( <i>I</i> )] | <i>R</i> <sub>1</sub> = 0.0695, <i>wR</i> <sub>2</sub> = 0.1524                                                  |
| Final <i>R</i> indexes [all data]                    | <i>R</i> <sub>1</sub> = 0.0863, <i>wR</i> <sub>2</sub> = 0.1566                                                  |
| Largest diff. peak/hole / e Å <sup>-3</sup>          | 1.01/-0.89                                                                                                       |

**Table S2** The crystal structure parameters for (AgCu)<sub>14</sub>-1.

|                                             |                                                                                                                                                             |
|---------------------------------------------|-------------------------------------------------------------------------------------------------------------------------------------------------------------|
| Empirical formula                           | C <sub>165</sub> H <sub>113</sub> Ag <sub>11.192</sub> Cl <sub>7</sub> Cu <sub>2.808</sub> F <sub>60</sub> O <sub>17.5</sub> P <sub>4</sub> S <sub>12</sub> |
| Formula weight                              | 5658.0                                                                                                                                                      |
| Temperature/K                               | 170                                                                                                                                                         |
| Crystal system                              | triclinic                                                                                                                                                   |
| Space group                                 | <i>P</i> $\bar{1}$                                                                                                                                          |
| a/Å                                         | 18.7706(7)                                                                                                                                                  |
| b/Å                                         | 19.9187(9)                                                                                                                                                  |
| c/Å                                         | 25.5916(12)                                                                                                                                                 |
| $\alpha$ /°                                 | 89.783(2)                                                                                                                                                   |
| $\beta$ /°                                  | 88.6660(10)                                                                                                                                                 |
| $\gamma$ /°                                 | 87.6930(10)                                                                                                                                                 |
| Volume/Å <sup>3</sup>                       | 9558.0(7)                                                                                                                                                   |
| Z                                           | 2                                                                                                                                                           |
| $\rho_{\text{calc}}$ /cm <sup>3</sup>       | 1.966                                                                                                                                                       |
| $\mu$ /mm <sup>-1</sup>                     | 1.804                                                                                                                                                       |
| F(000)                                      | 5523.0                                                                                                                                                      |
| Radiation                                   | Mo K $\alpha$ ( $\lambda$ = 0.71073)                                                                                                                        |
| 2 $\Theta$ range for data collection/°      | 3.896 to 51                                                                                                                                                 |
| Index ranges                                | -22 $\leq$ h $\leq$ 22, -24 $\leq$ k $\leq$ 24, -30 $\leq$ l $\leq$ 30                                                                                      |
| Reflections collected                       | 309839                                                                                                                                                      |
| Independent reflections                     | 35550 [ $R_{\text{int}}$ = 0.0665, $R_{\text{sigma}}$ = 0.0339]                                                                                             |
| Data/restraints/parameters                  | 35550/4178/2389                                                                                                                                             |
| Goodness-of-fit on F <sup>2</sup>           | 1.053                                                                                                                                                       |
| Final R indexes [ $I \geq 2\sigma(I)$ ]     | $R_1$ = 0.0344, $wR_2$ = 0.0842                                                                                                                             |
| Final R indexes [all data]                  | $R_1$ = 0.0514, $wR_2$ = 0.0907                                                                                                                             |
| Largest diff. peak/hole / e Å <sup>-3</sup> | 0.90/-0.74                                                                                                                                                  |

**Table S3** The crystal structure parameters for (AgCu)<sub>14</sub>-2.

|                                             |                                                                                                                                                          |
|---------------------------------------------|----------------------------------------------------------------------------------------------------------------------------------------------------------|
| Empirical formula                           | C <sub>160</sub> H <sub>98</sub> Ag <sub>10.463</sub> Cl <sub>2</sub> Cu <sub>3.537</sub> F <sub>60</sub> O <sub>15</sub> P <sub>4</sub> S <sub>12</sub> |
| Formula weight                              | 5333.26                                                                                                                                                  |
| Temperature/K                               | 170                                                                                                                                                      |
| Crystal system                              | triclinic                                                                                                                                                |
| Space group                                 | <i>P</i> $\bar{1}$                                                                                                                                       |
| a/Å                                         | 18.7192(11)                                                                                                                                              |
| b/Å                                         | 19.3113(13)                                                                                                                                              |
| c/Å                                         | 25.7905(17)                                                                                                                                              |
| $\alpha$ /°                                 | 89.531(2)                                                                                                                                                |
| $\beta$ /°                                  | 89.166(2)                                                                                                                                                |
| $\gamma$ /°                                 | 85.539(2)                                                                                                                                                |
| Volume/Å <sup>3</sup>                       | 9293.6(10)                                                                                                                                               |
| Z                                           | 2                                                                                                                                                        |
| $\rho_{\text{calc}}$ /cm <sup>3</sup>       | 1.906                                                                                                                                                    |
| $\mu$ /mm <sup>-1</sup>                     | 1.786                                                                                                                                                    |
| F(000)                                      | 5197.0                                                                                                                                                   |
| Radiation                                   | Mo K $\alpha$ ( $\lambda$ = 0.71073)                                                                                                                     |
| 2 $\Theta$ range for data collection/°      | 3.814 to 50                                                                                                                                              |
| Index ranges                                | -22 $\leq$ h $\leq$ 22, -22 $\leq$ k $\leq$ 22, -30 $\leq$ l $\leq$ 30                                                                                   |
| Reflections collected                       | 193338                                                                                                                                                   |
| Independent reflections                     | 32726 [ $R_{\text{int}}$ = 0.0454, $R_{\text{sigma}}$ = 0.0315]                                                                                          |
| Data/restraints/parameters                  | 32726/5032/2287                                                                                                                                          |
| Goodness-of-fit on F <sup>2</sup>           | 1.111                                                                                                                                                    |
| Final R indexes [ $I \geq 2\sigma(I)$ ]     | $R_1$ = 0.0370, $wR_2$ = 0.1016                                                                                                                          |
| Final R indexes [all data]                  | $R_1$ = 0.0549, $wR_2$ = 0.1087                                                                                                                          |
| Largest diff. peak/hole / e Å <sup>-3</sup> | 1.21/-0.69                                                                                                                                               |
